# Supplementary material for: Disclosure Substitution
Source: Atypon-hosted journal article supplement (doi:10.1287/mnsc.2022.4549), 2022-09-29
Supplement: mnsc.2022.4549.sm1.pdf [file mnsc.2022.4549.sm1.pdf]

## **INTERNET APPENDIX**

This appendix reports results for additional tests briefly described in the paper.

Contents:

|              |                                                                   |
|--------------|-------------------------------------------------------------------|
| FIGURE IA-1. | Example of a Redacted Disclosure                                  |
| TABLE IA-1.  | Alternative Measures of Voluntary Disclosure                      |
| TABLE IA-2.  | Alternative Measure of Redactions                                 |
| TABLE IA-3.  | Estimation of Main Results using Logit                            |
| TABLE IA-4.  | Estimations of Main Results using Alternative Measurement Windows |

## Figure IA-1. Example of a Redacted Disclosure

This appendix uses excerpts from a purchase agreement filed by American Airlines as an example of redacted disclosure. As shown below, details pertaining to aircraft delivery, description, price, and payment have been redacted from the agreement.

Supplemental Agreement No. 24  
to  
Purchase Agreement No. 1980  
between  
The Boeing Company  
and  
AMERICAN AIRLINES, INC  
Relating to Boeing Model 777 Aircraft

EX-10.2 3 dex102.htm SUPPLEMENTAL AGREEMENT NO. 24 TO PURCHASE AGREEMENT NO. 1980

Exhibit 10.2

### TABLE OF CONTENTS

| <u>ARTICLES</u>                    | <u>PAGE &amp; SA NUMBER</u> |
|------------------------------------|-----------------------------|
| 1. Quantity, Model and Description | 1, SA-20                    |
| 2. Delivery Schedule               | 1, SA-20                    |
| 3. Price                           | 1, SA-20                    |
| 4. Payment                         | 2, SA-20                    |
| 5. Miscellaneous                   | 2, SA-20                    |

  

| <u>TABLE</u>                                                                                                                                                                                                                                                                                                                                                                                                                                                            | <u>SA NUMBER</u>                                 |
|-------------------------------------------------------------------------------------------------------------------------------------------------------------------------------------------------------------------------------------------------------------------------------------------------------------------------------------------------------------------------------------------------------------------------------------------------------------------------|--------------------------------------------------|
| 1. 777-200ER Aircraft Information Table: [CONFIDENTIAL PORTION OMITTED AND FILED SEPARATELY WITH THE COMMISSION PURSUANT TO A REQUEST FOR CONFIDENTIAL TREATMENT]<br>Jul. [CONFIDENTIAL PORTION OMITTED AND FILED SEPARATELY WITH THE COMMISSION PURSUANT TO A REQUEST FOR CONFIDENTIAL TREATMENT] Airframe Base Year<br>Jul. [CONFIDENTIAL PORTION OMITTED AND FILED SEPARATELY WITH THE COMMISSION PURSUANT TO A REQUEST FOR CONFIDENTIAL TREATMENT] Engine Base Year | Original Purchase Agreement, SA-3, SA-17 & SA-18 |
| 1-1. 777-200IGW Aircraft Information Table: [CONFIDENTIAL PORTION OMITTED AND FILED SEPARATELY WITH THE COMMISSION PURSUANT TO A REQUEST FOR CONFIDENTIAL TREATMENT]<br>Jul. [CONFIDENTIAL PORTION OMITTED AND FILED SEPARATELY WITH THE COMMISSION PURSUANT TO A REQUEST FOR CONFIDENTIAL TREATMENT] Airframe & Engine Base Year                                                                                                                                       | SA-1                                             |
| 1-2. 777-200IGW Aircraft Information Table: [CONFIDENTIAL PORTION OMITTED AND FILED SEPARATELY WITH THE COMMISSION PURSUANT TO A REQUEST FOR CONFIDENTIAL TREATMENT]                                                                                                                                                                                                                                                                                                    | SA-2 & SA-6                                      |

**Table 1-7**  
**777-323ER** [CONFIDENTIAL PORTION OMITTED AND FILED SEPARATELY WITH THE COMMISSION PURSUANT TO A REQUEST FOR CONFIDENTIAL TREATMENT] **Aircraft**  
**Aircraft Delivery, Description, Price and Advance Payments**

[CONFIDENTIAL PORTION OMITTED AND FILED SEPARATELY WITH THE COMMISSION PURSUANT TO A REQUEST FOR CONFIDENTIAL TREATMENT]

AAL-PA-01980  
SA-20 APR 55725  
SA-22, SA-23 and SA-24 APR 56305

**Boeing Proprietary**

SA-23  
Page 1

**Table IA-1. Alternative Measures of Voluntary Disclosure**

***Panel A. Portfolio sorts***

| Variable        | All firm-years | Firm-years with $NRedact = 0$ | Firm-years with $NRedact = 1$ | Firm-years with $NRedact = 2$ | Firm-years with $NRedact = 3$ | Firm-years with $NRedact \geq 4$ |
|-----------------|----------------|-------------------------------|-------------------------------|-------------------------------|-------------------------------|----------------------------------|
| $Pr(Forecast)$  | 0.51           | 0.50                          | 0.59                          | 0.59                          | 0.64                          | 0.72                             |
| $PressReleases$ | 23.88          | 23.60                         | 25.57                         | 27.52                         | 32.12                         | 32.28                            |
| Observations    | 27,401         | 24,880                        | 1,724                         | 538                           | 176                           | 83                               |

***Panel B. Measure of Voluntary Disclosure: Management Forecasts***

| Variable         | Dependent variable: <i>Forecast</i> |                   |                   |
|------------------|-------------------------------------|-------------------|-------------------|
|                  | (1)                                 | (2)               | (3)               |
| <i>Redact</i>    | 0.10***<br>(6.46)                   | 0.08***<br>(6.56) | 0.03***<br>(3.64) |
| Controls         | No                                  | Yes               | Yes               |
| Year Effects     | No                                  | Yes               | Yes               |
| Industry Effects | No                                  | Yes               | No                |
| Firm Effects     | No                                  | No                | Yes               |
| $R^2$ (%)        | 0.3                                 | 34.7              | 79.5              |

***Panel C. Measure of Voluntary Disclosure: Number of Press Releases***

| Variable         | Dependent variable: <i>PressReleases</i> |                   |                  |
|------------------|------------------------------------------|-------------------|------------------|
|                  | (1)                                      | (2)               | (3)              |
| <i>Redact</i>    | 3.06***<br>(4.30)                        | 2.08***<br>(3.32) | 0.78**<br>(2.19) |
| Controls         | No                                       | Yes               | Yes              |
| Year Effects     | No                                       | Yes               | Yes              |
| Industry Effects | No                                       | Yes               | No               |
| Firm Effects     | No                                       | No                | Yes              |
| $R^2$ (%)        | 0.1                                      | 33.1              | 85.8             |

This table presents results from repeating the analysis in Panel B of Table 3 using two alternative measures of voluntary disclosure. Panel A presents the probability of a management forecast (*Forecast*) and the number of firm-initiated press releases (*PressReleases*) conditional on the number of redacted disclosures filed during the fiscal year (*NRedact*). Panel B presents results from estimating equation (1) using *Forecast* and *PressReleases* as the dependent variable. *Forecast* is an indicator variable equal to one if the firm issued a management forecast during the fiscal year, and zero otherwise. *PressReleases* is the number of firm-initiated press releases issued during the fiscal year. *t*-statistics appear in parentheses and are based on standard errors clustered by firm. \*\*\*, \*\*, and \* denote statistical significance at the 0.01, 0.05, and 0.10 levels (two-tail), respectively.

**Table IA-2. Alternative Measure of Redactions**

| Variable           | Dependent variable:<br><i>ForecastEarn</i> |                   |                   |
|--------------------|--------------------------------------------|-------------------|-------------------|
|                    | (1)                                        | (2)               | (3)               |
| <i>NRedact</i>     | 0.05***<br>(5.75)                          | 0.04***<br>(4.84) | 0.02***<br>(2.53) |
| Controls           | No                                         | Yes               | Yes               |
| Year Effects       | No                                         | Yes               | Yes               |
| Industry Effects   | No                                         | Yes               | No                |
| Firm Effects       | No                                         | No                | Yes               |
| R <sup>2</sup> (%) | 0.3                                        | 29.9              | 79.2              |

This table presents results from estimating the regression specifications in Panel B of Table 3 after measuring redacted mandatory disclosure using the number of redacted mandatory disclosures over the fiscal year (*NRedact*). *t*-statistics appear in parentheses and are based on standard errors clustered by firm. \*\*\*, \*\*, and \* denote statistical significance at the 0.01, 0.05, and 0.10 levels (two-tail), respectively.

**Table IA-3. Estimations of Main Results using Logit**

***Panel A. Estimation of Table 3, Panel B using Logit***

| Variable                  | Dependent variable:<br><i>ForecastEarn</i> |                   |                   |
|---------------------------|--------------------------------------------|-------------------|-------------------|
|                           | (1)                                        | (2)               | (3)               |
| <i>Redact</i>             | 0.38***<br>(6.17)                          | 0.37***<br>(4.80) | 0.42***<br>(2.65) |
| Controls                  | No                                         | Yes               | Yes               |
| Year Effects              | No                                         | Yes               | Yes               |
| Industry Effects          | No                                         | Yes               | No                |
| Firm Effects              | No                                         | No                | Yes               |
| Pseudo-R <sup>2</sup> (%) | 0.2                                        | 26.3              | 24.0              |

***Panel B. Estimation of Table 5, Panel C using Logit***

| Variable                  | Dependent variable:<br><i>AddlForecastEarn</i> |                   |
|---------------------------|------------------------------------------------|-------------------|
|                           | (1)                                            | (2)               |
| <i>Redact</i>             | 0.78***<br>(8.69)                              | 0.88***<br>(8.27) |
| Controls                  | Yes                                            | Yes               |
| Year Effects              | Yes                                            | No                |
| Firm Effects              | Yes                                            | No                |
| Firm–Year Effects         | No                                             | Yes               |
| Pseudo-R <sup>2</sup> (%) | 19.75                                          | 16.21             |

Panel A presents results from estimating Table 3, Panel B using a Logit model. All variables are as defined in Table 2. Panel B presents results from estimating Table 5, Panel C using a Logit model. For parsimony, we do not tabulate coefficients on control variables. *z*-statistics appear in parentheses and are based on standard errors clustered by firm. \*\*\*, \*\*, and \* denote statistical significance at the 0.01, 0.05, and 0.10 levels (two-tail), respectively.

**Table IA-4. Estimations of Main Results using Alternative Measurement Window**

**Panel A. Estimation of Table 3 Panel B using a 12-month window**

| Dependent variable:<br><i>ForecastEarn</i> |                   |                   |                   |
|--------------------------------------------|-------------------|-------------------|-------------------|
| Variable                                   | (1)               | (2)               | (3)               |
| <i>Redact</i>                              | 0.10***<br>(6.64) | 0.07***<br>(5.24) | 0.03***<br>(3.71) |
| Controls                                   | No                | Yes               | Yes               |
| Year Effects                               | No                | Yes               | Yes               |
| Industry Effects                           | No                | Yes               | No                |
| Firm Effects                               | No                | No                | Yes               |
| R <sup>2</sup> (%)                         | 0.4               | 29.8              | 79.5              |

**Panel B. Estimation of Table 5 Panel C using a 90-day window**

| Dependent variable: <i>AddtlForecastEarn</i> |                   |                   |
|----------------------------------------------|-------------------|-------------------|
| Variable                                     | (1)               | (2)               |
| <i>Redact</i>                                | 0.02***<br>(3.40) | 0.01***<br>(2.78) |
| Controls                                     | Yes               | Yes               |
| Year Effects                                 | Yes               | No                |
| Firm Effects                                 | Yes               | No                |
| Firm–Year Effects                            | No                | Yes               |
| R <sup>2</sup> (%)                           | 72.5              | 83.6              |

Panel A presents results from estimating the regression specifications in Panel B of Table 3 after measuring voluntary disclosure using an indicator variable for whether the firm provides an earnings forecast over the twelve months subsequent to the redacted disclosure (*ForecastEarn*). Panel B presents results from estimating the regression specifications in Panel C of Table 5 after measuring voluntary disclosure using an indicator variable for whether the firm provides an earnings forecast within 90 days of the redacted disclosure (*AddtlForecastEarn*). *t*-statistics appear in parentheses and are based on standard errors clustered by firm. \*\*\*, \*\*, and \* denote statistical significance at the 0.01, 0.05, and 0.10 levels (two-tail), respectively.
